# Supplementary material for: In Staphylococcus aureus the regulation of pyruvate kinase activity by serine/threonine protein kinase favors biofilm formation
Source: PubMed Central journal article supplement (PMC4522715; doi:10.1007/s13205-014-0248-3), 2014-09-12
Supplement: 13205_2014_248_MOESM1_ESM.pdf [file 13205_2014_248_MOESM1_ESM.pdf]

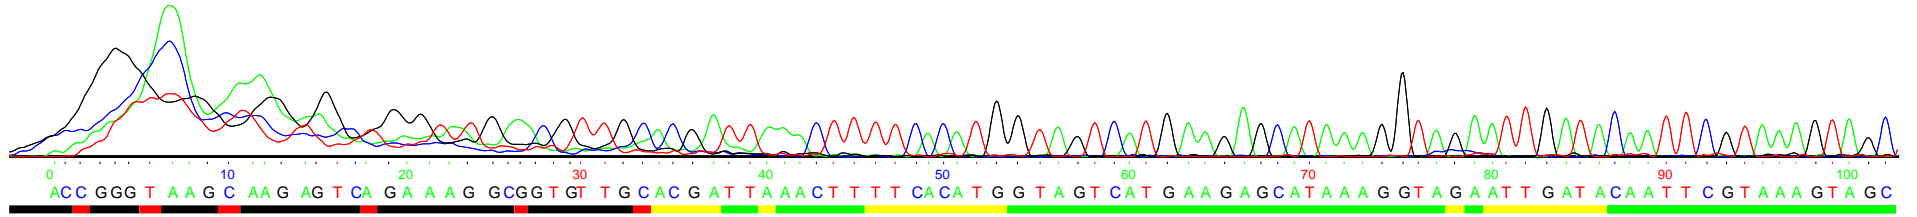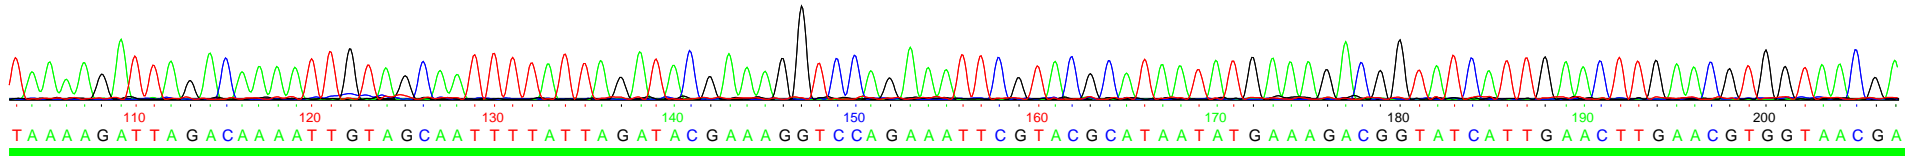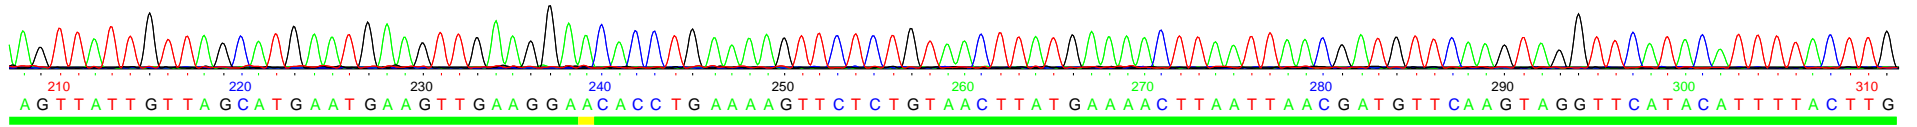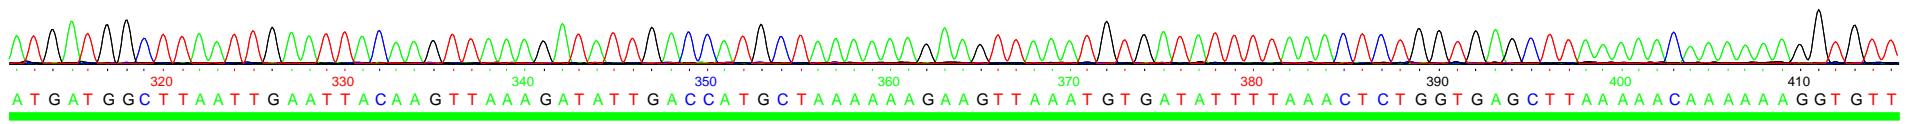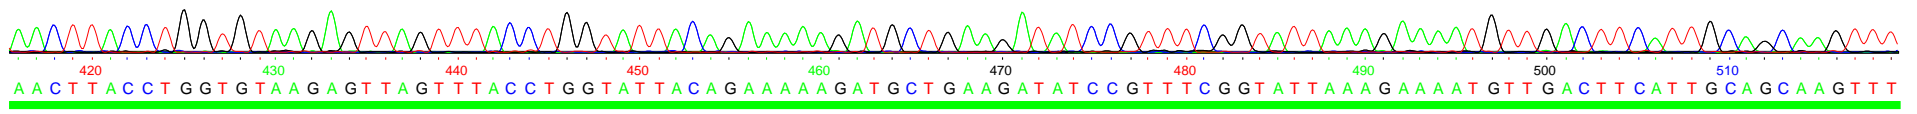

Quality colorcoding       0-9       10-19       20-29       >30

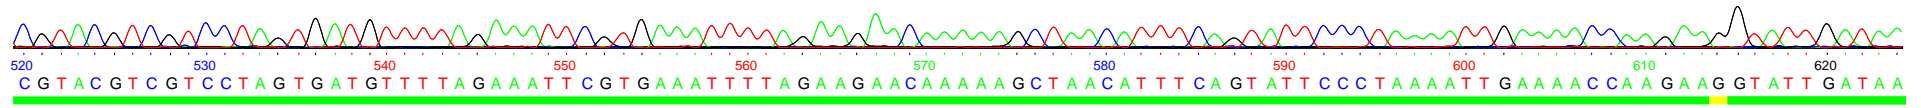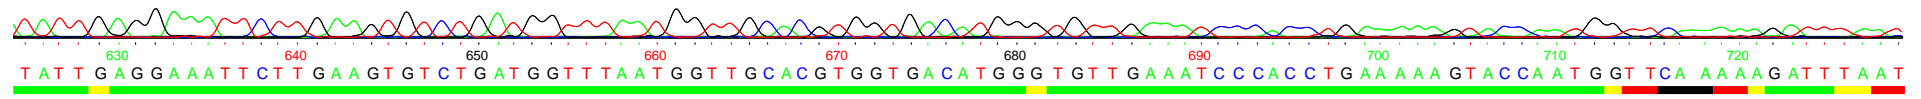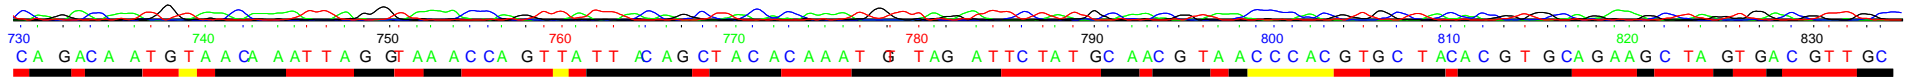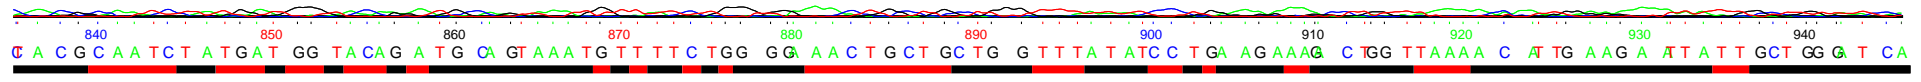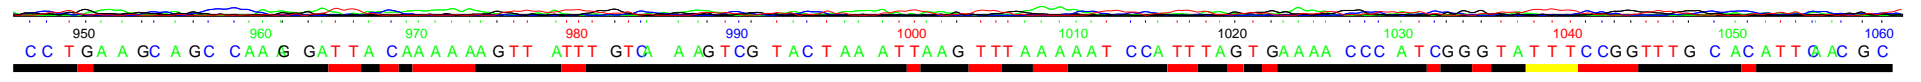

Quality colorcoding      ■ 0-9      ■ 10-19      ■ 20-29      ■ >30
